# Supplementary material
Source: publisher figshare collection journal article supplement (https://acs.figshare.com/ndownloader/files/22614002)
Supplement: Supplementary file 1 [file 22614002]

Compound	SMILE	GLUT (nM)	GLUT1 (nM)	GLUT3 (nM)
8	O=C(NC(C)C)COC1=CC(C2=NC3=C(C=C(OCC)C=C3)C(NC4=CC=C(C5=CNN=C5)C=C4)=N2)=CC=C1	150
9a	CC(C)NC(COC1=CC(C2=NC3=C(SC=C3)C(NC4=CC=C(C5=CNN=C5)C=C4)=N2)=CC=C1)=O	200
9b	CC(C)NC(COC1=CC(C2=NC3=C(OC=C3)C(NC4=CC=C(C5=CNN=C5)C=C4)=N2)=CC=C1)=O	259
9c	CC(C)NC(COC1=CC(C2=NC3=C(COC3)C(NC4=CC=C(C5=CNN=C5)C=C4)=N2)=CC=C1)=O	74
9d	CC(C)NC(COC1=CC(C2=NC3=C(N=CN3C)C(NC4=CC=C(C5=CNN=C5)C=C4)=N2)=CC=C1)=O	328
9e	CC(C)NC(COC1=CC(C2=NC3=C(C=CS3)C(NC4=CC=C(C5=CNN=C5)C=C4)=N2)=CC=C1)=O	146
9f	O=C(NC(C)C)COC1=CC(C2=NC3=C(N=CC=C3)C(NC4=CC=C(C5=CNN=C5)C=C4)=N2)=CC=C1	3474
9g	CC(C)NC(COC1=CC(C2=NC3=C(C=NC=C3)C(NC4=CC=C(C5=CNN=C5)C=C4)=N2)=CC=C1)=O	36
9h	O=C(NC(C)C)COC1=CC(C2=NC3=C(C=CN=C3)C(NC4=CC=C(C5=CNN=C5)C=C4)=N2)=CC=C1	38
9i	O=C(NC(C)C)COC1=CC(C2=NC3=C(C=NN3C)C(NC4=CC=C(C5=CNN=C5)C=C4)=N2)=CC=C1	350
9j	O=C(NC(C)C)COC1=CC(C2=NC3=C(N(C)N=C3)C(NC4=CC=C(C5=CNN=C5)C=C4)=N2)=CC=C1	1980
9k	O=C(NC(C)C)COC1=CC(C2=NC3=C(N=CS3)C(NC4=CC=C(C5=CNN=C5)C=C4)=N2)=CC=C1	298
9l	O=C(NC(C)C)COC1=CC(C2=NC3=C(CN(C)CC3)C(NC4=CC=C(C5=CNN=C5)C=C4)=N2)=CC=C1	282
9m	O=C(NC(C)C)COC1=CC(C2=NC3=C(CN(C(C)=O)CC3)C(NC4=CC=C(C5=CNN=C5)C=C4)=N2)=CC=C1	110
10a	O=C(NCCC)COC1=CC(C2=NC3=C(COC3)C(NC4=CC=C(C5=CNN=C5)C=C4)=N2)=CC=C1		447	298
10b	O=C(NC1CC1)COC2=CC(C3=NC4=C(COC4)C(NC5=CC=C(C6=CNN=C6)C=C5)=N3)=CC=C2		666	238
10c	O=C(NC1CCC1)COC2=CC(C3=NC4=C(COC4)C(NC5=CC=C(C6=CNN=C6)C=C5)=N3)=CC=C2		179	68
10d	O=C(NC1CCCC1)COC2=CC(C3=NC4=C(COC4)C(NC5=CC=C(C6=CNN=C6)C=C5)=N3)=CC=C2		102	47
10e	O=C(N(CC)CC)COC1=CC(C2=NC3=C(COC3)C(NC4=CC=C(C5=CNN=C5)C=C4)=N2)=CC=C1		1828	686
10f	O=C(N1CCCC1)COC2=CC(C3=NC4=C(COC4)C(NC5=CC=C(C6=CNN=C6)C=C5)=N3)=CC=C2		>10000	1414
10g	O=C(NC(C)(CC)C)COC1=CC(C2=NC3=C(COC3)C(NC4=CC=C(C5=CNN=C5)C=C4)=N2)=CC=C1		37	12
10h	O=C(NCC(F)(F)F)COC1=CC(C2=NC3=C(COC3)C(NC4=CC=C(C5=CNN=C5)C=C4)=N2)=CC=C1		565	160
10i	O=C(NC1=CC=CC=C1)COC2=CC(C3=NC4=C(COC4)C(NC5=CC=C(C6=CNN=C6)C=C5)=N3)=CC=C2		885	325
11a	O=C(NC(CC)CC)COC1=CC(C2=NC3=C(COCC3)C(NC4=CC=C(C5=CNN=C5)C=C4)=N2)=CC=C1		48	33
11b	O=C(NC(C)(C)C)COC1=CC(C2=NC3=C(COCC3)C(NC4=CC=C(C5=CNN=C5)C=C4)=N2)=CC=C1		36	26
12a	O=C(NCC(C)C)COC1=CC(C2=NC3=C(CN(C)CC3)C(NC4=CC=C(C5=CNN=C5)C=C4)=N2)=CC=C1		---	846
12b	O=C(NC1CCC1)COC2=CC(C3=NC4=C(CN(C)CC4)C(NC5=CC=C(C6=CNN=C6)C=C5)=N3)=CC=C2		763	566
12c	O=C(NC1CCCC1)COC2=CC(C3=NC4=C(CN(C)CC4)C(NC5=CC=C(C6=CNN=C6)C=C5)=N3)=CC=C2		559	391
12d	O=C(NC(CC)CC)COC1=CC(C2=NC3=C(CN(C)CC3)C(NC4=CC=C(C5=CNN=C5)C=C4)=N2)=CC=C1		789	584
12e	O=C(NC(C)(C)C)COC1=CC(C2=NC3=C(CN(C)CC3)C(NC4=CC=C(C5=CNN=C5)C=C4)=N2)=CC=C1		359	368
12f	O=C(NC(C)(CC)C)COC1=CC(C2=NC3=C(CN(C)CC3)C(NC4=CC=C(C5=CNN=C5)C=C4)=N2)=CC=C1		342	391
12g	O=C(NC(C)C)COC1=CC(C2=NC3=C(CNCC3)C(NC4=CC=C(C5=CNN=C5)C=C4)=N2)=CC=C1		1458	365
12h	O=C(NC1CCCC1)COC2=CC(C3=NC4=C(CNCC4)C(NC5=CC=C(C6=CNN=C6)C=C5)=N3)=CC=C2		459	138
12i	O=C(NC(CC)CC)COC1=CC(C2=NC3=C(CNCC3)C(NC4=CC=C(C5=CNN=C5)C=C4)=N2)=CC=C1		441	121
12j	O=C(NC(C)(C)C)COC1=CC(C2=NC3=C(CNCC3)C(NC4=CC=C(C5=CNN=C5)C=C4)=N2)=CC=C1		220	58
12k	O=C(NC(C)C)COC1=CC(C2=NC3=C(CN(CC)CC3)C(NC4=CC=C(C5=CNN=C5)C=C4)=N2)=CC=C1		1578	846
12l	O=C(NC(C)(C)C)COC1=CC(C2=NC3=C(CN(CC)CC3)C(NC4=CC=C(C5=CNN=C5)C=C4)=N2)=CC=C1		552	482
12m	O=C(NC(C)C)COC1=CC(C2=NC3=C(CN(C(C)C)CC3)C(NC4=CC=C(C5=CNN=C5)C=C4)=N2)=CC=C1		2711	619
12n	O=C(NCC(C)C)COC1=CC(C2=NC3=C(CN(C(C)C)CC3)C(NC4=CC=C(C5=CNN=C5)C=C4)=N2)=CC=C1		1890	802
12o	O=C(NC1CCCC1)COC2=CC(C3=NC4=C(CN(C(C)C)CC4)C(NC5=CC=C(C6=CNN=C6)C=C5)=N3)=CC=C2		1112	548
12p	O=C(NC(C)(C)C)COC1=CC(C2=NC3=C(CN(C(C)C)CC3)C(NC4=CC=C(C5=CNN=C5)C=C4)=N2)=CC=C1		326	412
13a	O=C(NC(C)(C)C)COC1=CC(C2=NC3=C(CN(C(C)CF)CC3)C(NC4=CC=C(C5=CNN=C5)C=C4)=N2)=CC=C1		105	232
14b	O=C(NC1(C)CC1)COC2=CC(C3=NC4=C(CN(C5CC5)CC4)C(NC6=CC=C(C7=CNN=C7)C=C6)=N3)=CC=C2		72	211
14c	O=C(NC(C)C)COC1=CC(C2=NC3=C(CN(C4CC4)CC3)C(NC5=CC=C(C6=CNN=C6)C=C5)=N2)=CC=C1		140	548
15a	O=C(NC(C)(C)C)COC1=CC(C(N=C2NC3=CC=C(C4=CNN=C4)C=C3)=NC5=C2CN(C6CCC6)CC5)=CC=C1		259	287
15b	O=C(NC1(CC1)C)COC2=CC(C3=NC4=C(CN(C5CCC5)CC4)C(NC6=CC=C(C7=CNN=C7)C=C6)=N3)=CC=C2		242	179
15c	O=C(NC(C)C)COC1=CC(C2=NC3=C(CN(C4CCC4)CC3)C(NC5=CC=C(C6=CNN=C6)C=C5)=N2)=CC=C1		914	238
16c	CC(NC(COC1=CC(C2=NC3=C(CN(C4(C)CC4)CC3)C(NC5=CC=C(C6=CNN=C6)C=C5)=N2)=CC=C1)=O)C		1048	392
17a	CC(C)(C)NC(COC1=CC(C(N=C2NC3=CC=C(C4=CNN=C4)C=C3)=NC5=C2CN(C6COCC6)CC5)=CC=C1)=O		161	155
18a	O=C(NC(C)(C)C)COC1=CC(C(N=C2NC3=CC=C(C4=CNN=C4)C=C3)=NC5=C2CN(CCOC)CC5)=CC=C1		143	175
19a	O=C(NC(C)(C)C)COC1=CC(C2=NC3=C(CN(C(C)COC)CC3)C(NC4=CC=C(C5=CNN=C5)C=C4)=N2)=CC=C1		128	275
